# Supplementary material for: A novel route towards well-dispersed short nanofibers and nanoparticles via electrospinning
Source: Royal Society of Chemistry journal article supplement (doi:10.1039/c5ra26583e), 2016-01-01
Supplement: c5ra26583e1.pdf [file c5ra26583e1.pdf]

## Supplementary Information:

Novel route towards well-dispersed short nanofibers and nanoparticles  
via electrospinning

Yaqi Ren, Shuguang Wang, Ruyang Liu, Jie Dai, Xiang Liu and Jie Yu\*

Shenzhen Engineering Lab for Supercapacitor Materials, Shenzhen Key Laboratory  
for Advanced Materials, Department Material Science and Engineering, Shenzhen  
Graduate School, Harbin Institute of Technology, University Town, Shenzhen, China.

E-mail: [jyu@hitsz.edu.cn](mailto:jyu@hitsz.edu.cn)

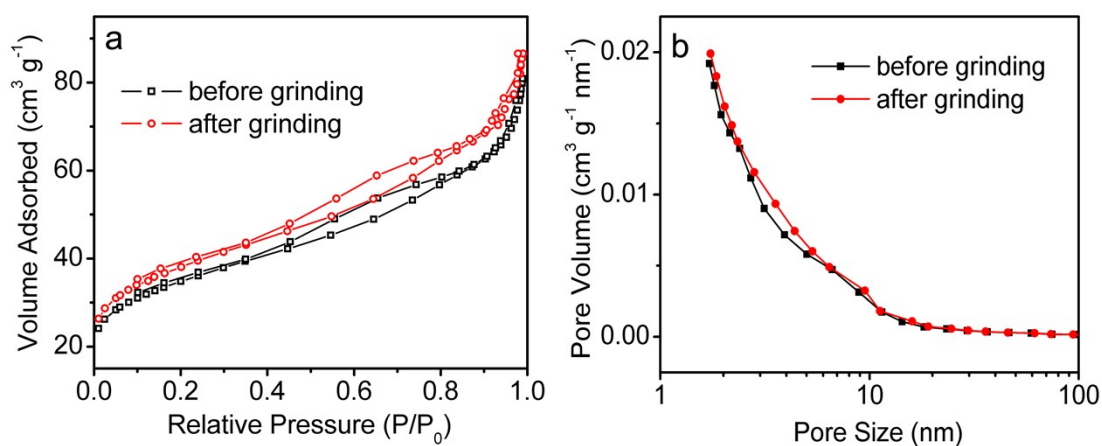

Figure S1 Nitrogen sorption isotherms (a) and pore size distribution (b) of the TiC sample before and after mild grinding

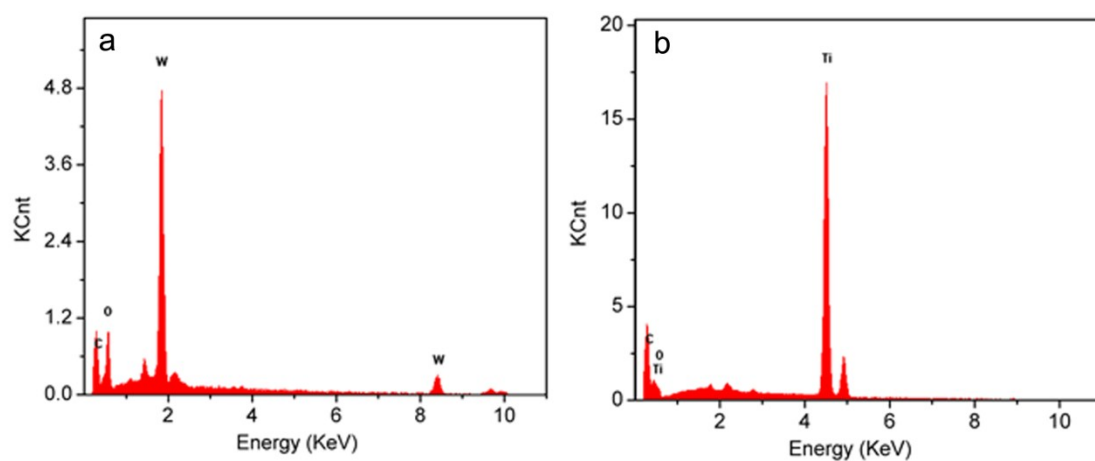

Fig. S2 EDX spectra of WC (a) and TiC (b)

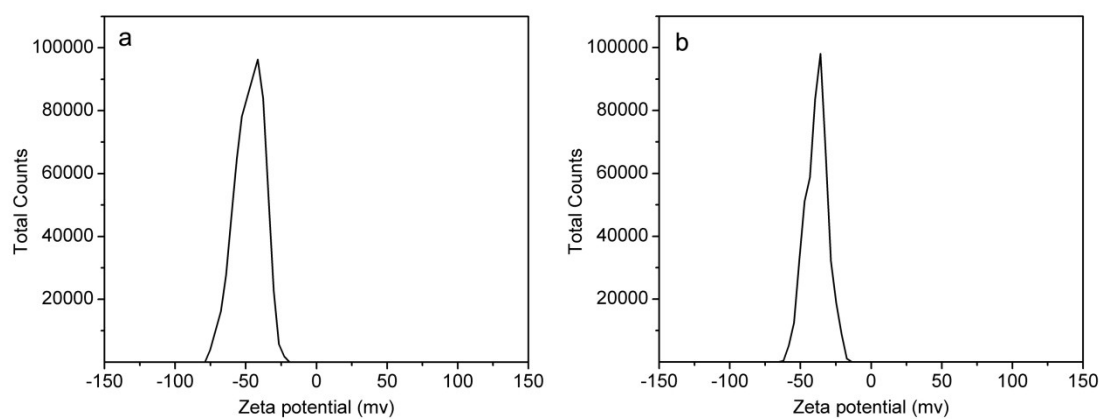

Fig. S3  $\xi$ -potentials of WC (a) and TiC (b) after grinding

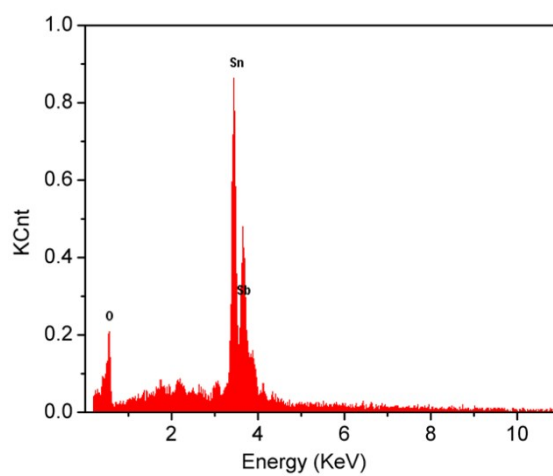

Fig. S4 EDX spectrum of ATO

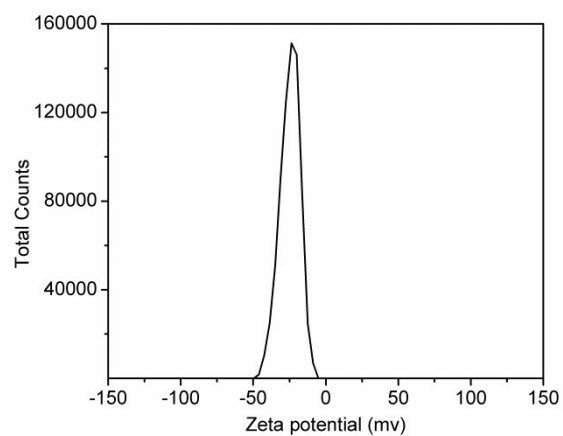

Fig. S5  $\xi$ -potential of ATO after grinding

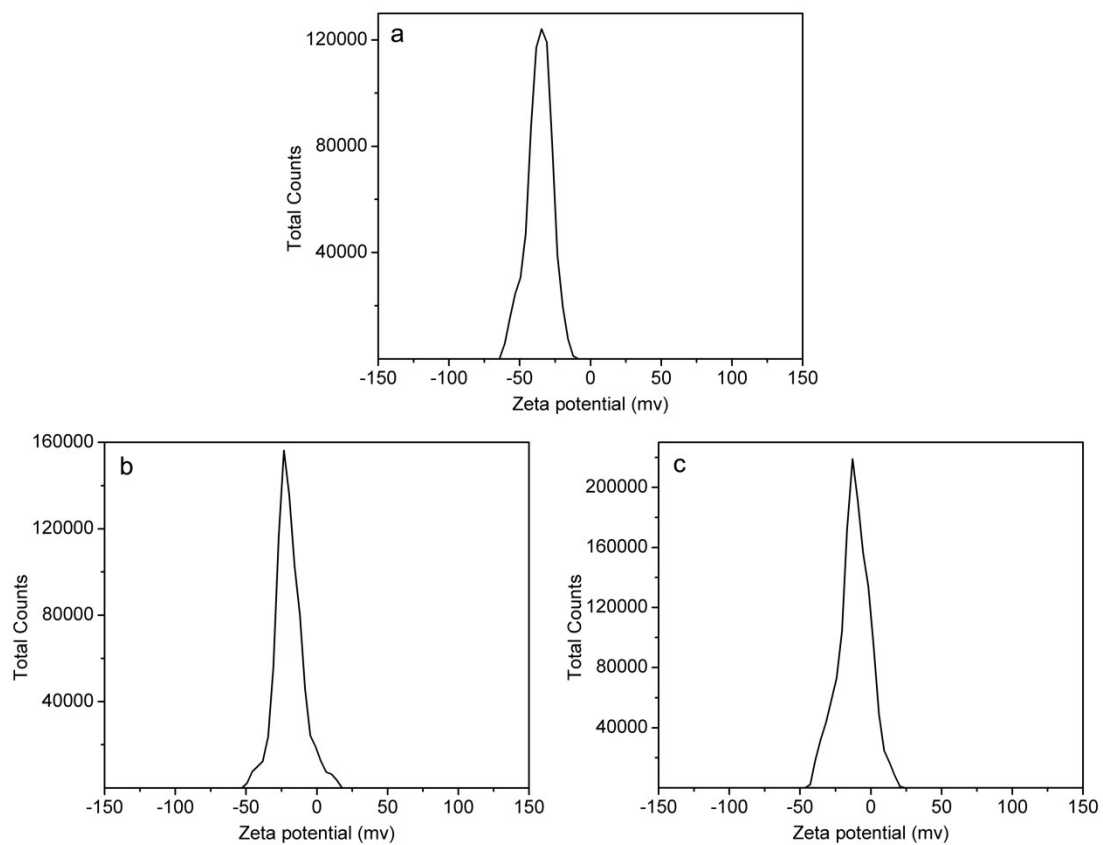

Fig. S6  $\xi$ -potentials of W (a), Ni (b), and Cu (c) after grinding
